# Supplementary material
Source: PubMed Central journal article supplement (PMC4729896)
Supplement: ncomms10213-s1.pdf [file ncomms10213-s1.pdf]

Supplementary Figure 1

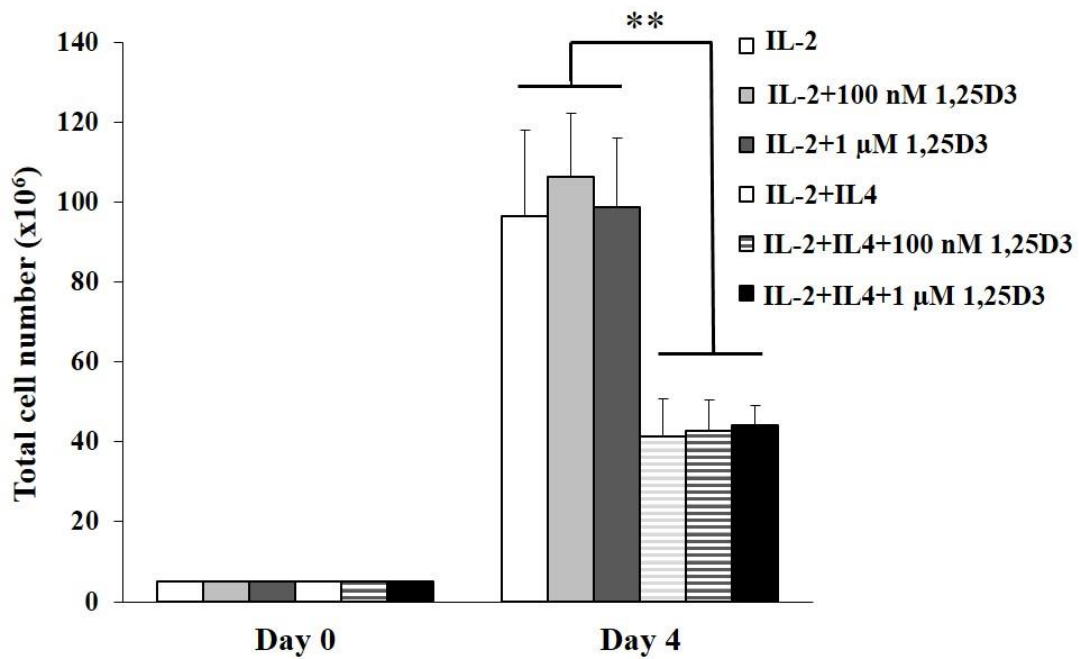

Cell viability of CD8<sup>+</sup> T cells differentiated in IL-2 or IL-2+IL-4 is not altered by 1,25D3 (100 nM or 1 μM). Total cell numbers were counted on days 0 and 4 during CD8<sup>+</sup> T cells differentiation in IL-2 or IL-2+IL-4 in the presence or absence of 100 nM or 1 μM 1,25D3. Data (mean±SEM) are from five experiments. \*\*p<0.01 compared to the IL-2 group on day 4.

**Supplementary Figure 2**

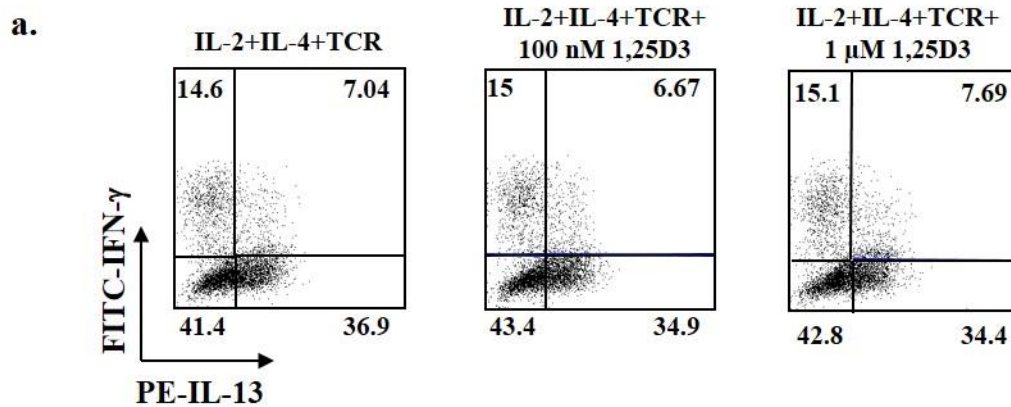

**b.**

| Groups                      | IL-2+IL-4+ TCR | IL-2+IL-4+ TCR+ 100 nM 1,25D3 | IL-2+IL-4+ TCR+ 1 $\mu$ M 1,25D3 |
|-----------------------------|----------------|-------------------------------|----------------------------------|
| IFN- $\gamma^+$             | 14.5 $\pm$ 0.3 | 14.7 $\pm$ 0.3                | 15.1 $\pm$ 0.4                   |
| IL-13 $^+$                  | 31.1 $\pm$ 3.6 | 30.2 $\pm$ 2.6                | 28.7 $\pm$ 3.2                   |
| IFN- $\gamma^+$ /IL-13 $^+$ | 4.6 $\pm$ 1.4  | 4.6 $\pm$ 1.2                 | 4.6 $\pm$ 1.7                    |
| IFN- $\gamma^-$ /IL-13 $^-$ | 49.8 $\pm$ 5   | 52.5 $\pm$ 6.8                | 51.6 $\pm$ 4.9                   |

**Presence of 1,25D3 only during the antigen re-stimulation phase does not alter IFN- $\gamma$  and IL-13 production in CD8 $^+$  T cells differentiated in IL-2 or IL-2+IL-4. (a)** Representative results of intracellular staining and **(b)** data (mean $\pm$ SEM) showing percent positive cells (four independent experiments) for IFN- $\gamma$  and IL-13 expression in CD8 $^+$  T cells differentiated in IL-2 or IL-2+IL-4 with SIINFEKL (T cell receptor, TCR) restimulation. 1,25D3 (100 nM or 1  $\mu$ M) was added for 4 hours only during the antigen restimulation phase.

### Supplementary Figure 3

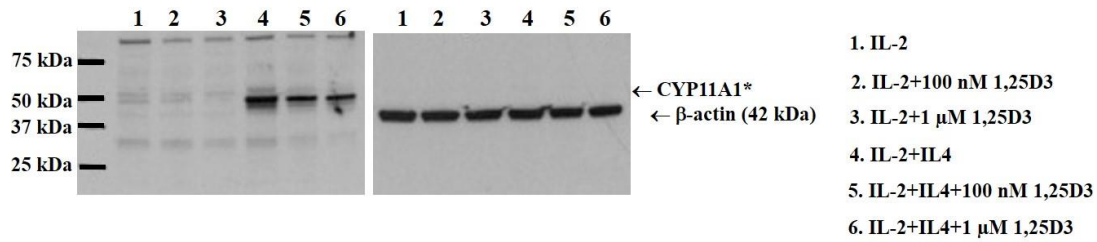

**1,25D3 treatment of CD8<sup>+</sup> T cells alters CYP11A1 protein levels.** Representative results of a CYP11A1 western blot of CD8<sup>+</sup> T cells differentiated in IL-2 or IL-2+IL-4 in the presence of absence of 100 nM or 1 μM 1,25D3. \* calculated molecular weight (MW) for CYP11A1 (13363-1-AP, Proteintech, Chicago, IL): 60 kDa, observed MW: 49 kDa

### Supplementary Figure 4

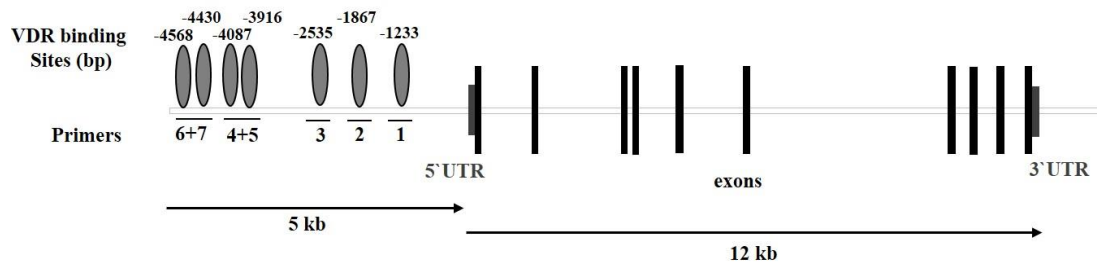

**Genomic structure of *Cyp11a1* and localization of VDR binding sites in the *Cyp11a1* promoter region.** Exons are displayed in black and smaller grey boxes represent 5' and 3' untranslated regions (UTR). VDR binding sites in the *Cyp11a1* promoter and respective *Cyp11a1*-specific primers are depicted relative to the location of the CYP11A1 coding region.

## Supplementary Figure 5

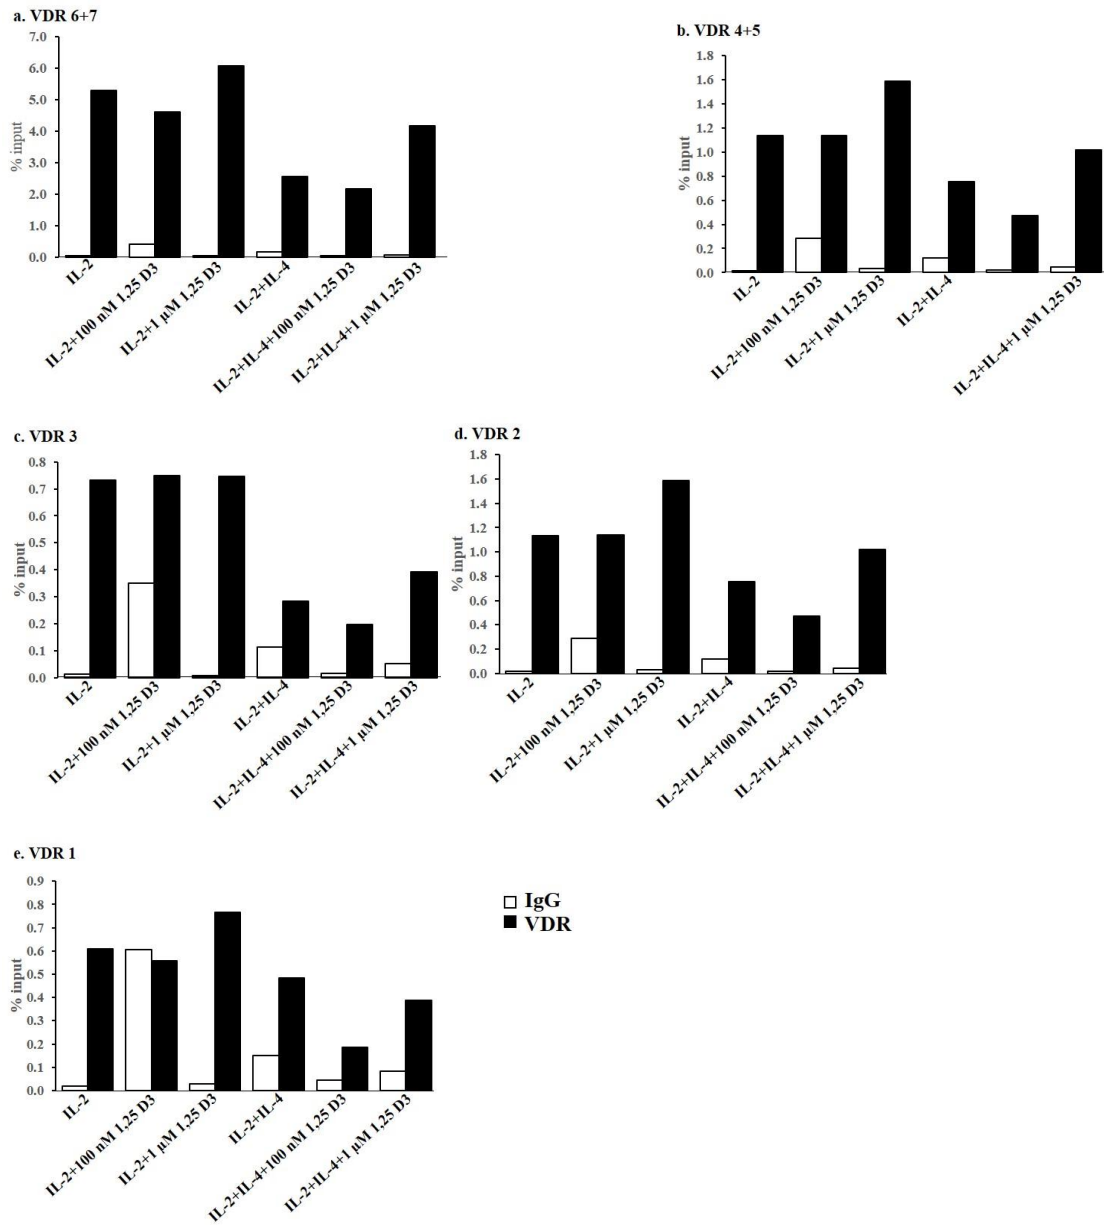

**1,25D3-mediated VDR recruitment to the *Cyp11a1* promoter region is altered in CD8<sup>+</sup> T cells differentiated in IL-2 or IL-2+IL-4 in the presence or absence of 100 nM or 1 μM 1,25D3. (a-e)** A representative experiment of the percent input immunoprecipitated by the VDR and the negative control IgG antibody. qPCR was performed using 5 *Cyp11a1* promoter-specific primers [(a) VDR 6+7, (b) VDR 4+5, (c) VDR 3, (d) VDR 2, (e) VDR1] covering seven VDR binding sites. Data were analyzed via the percent input methodology:  $(2^{(CT \text{ of total input} - CT \text{ of specific IP})}) \times 100$ .

Supplementary Figure 6

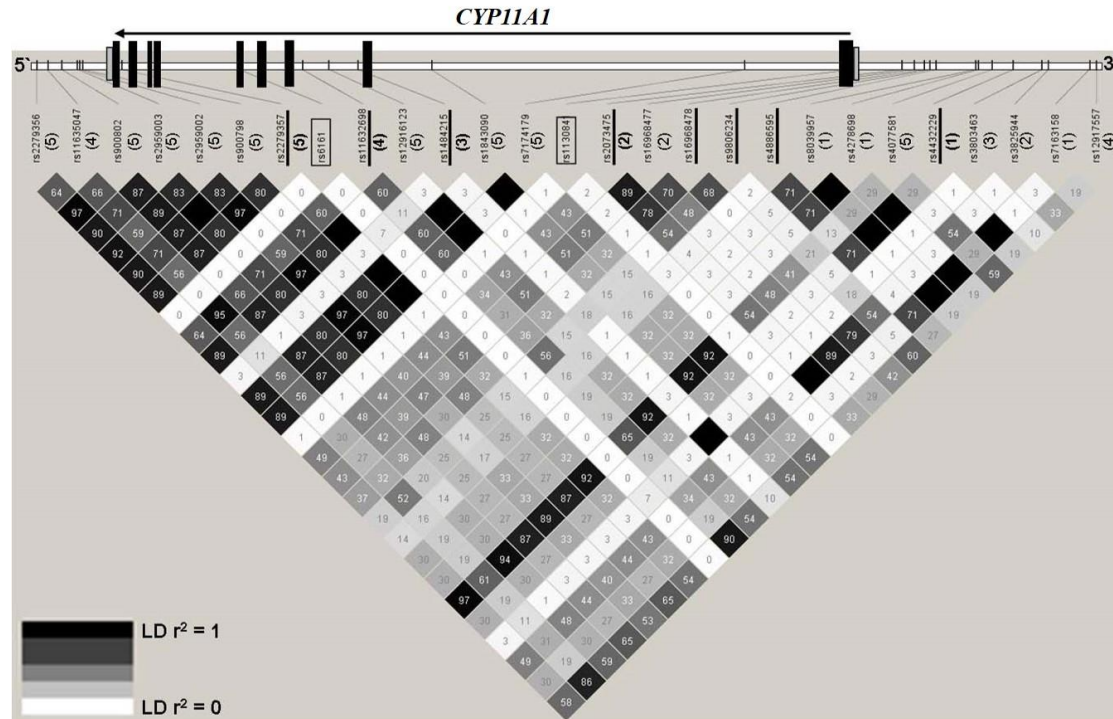

**Genomic structure, localization, and linkage disequilibrium ( $r^2$  plot) of the genotyped *CYP11A1* polymorphisms.** In the upper panel, the genomic structure and localization of the genotyped tagging polymorphisms within the *CYP11A1* locus are depicted. Arrows indicate transcriptional direction. Exons are displayed in black and smaller grey boxes represent 5' and 3' untranslated regions (UTR). In the lower panel, linkage disequilibrium ( $r^2$  plot) corresponding to the respective tagging bins (bins 1-5) of *CYP11A1* is shown with  $r^2 > 0.80$ . Tagging SNPs (MAF  $\geq 0.03$ ) are underlined. In addition, rs6161 and rs113084 (MAF  $\leq 0.005$ ) were genotyped as they lead to an amino acid change (marked in black box).

**Supplementary Table 1: IFN- $\gamma$  and IL-13 expression in CD8<sup>+</sup> T cells differentiated in IL-2 or IL-2+IL-4 in the presence of 1,25D3.**

|                                                                  | % of positive cells |                          |                              |                   |                                   |                                       |                   |                                  |                                      |                   |                                           |                                               |
|------------------------------------------------------------------|---------------------|--------------------------|------------------------------|-------------------|-----------------------------------|---------------------------------------|-------------------|----------------------------------|--------------------------------------|-------------------|-------------------------------------------|-----------------------------------------------|
|                                                                  | IL-2                | IL-2+<br>VitD<br>(100nM) | IL-2+<br>VitD<br>(1 $\mu$ M) | IL-2+<br>IL4      | IL-2+<br>IL-4+<br>VitD<br>(100nM) | IL-2+<br>IL-4+<br>VitD<br>(1 $\mu$ M) | IL-2+<br>TCR      | IL-2+<br>TCR+<br>VitD<br>(100nM) | IL-2+<br>TCR+<br>VitD<br>(1 $\mu$ M) | IL-2+<br>TCR      | IL-2+<br>IL-4+<br>TCR+<br>VitD<br>(100nM) | IL-2+<br>IL-4+<br>TCR+<br>VitD<br>(1 $\mu$ M) |
| <b>IFN-<math>\gamma</math><sup>+</sup></b>                       | 3.3<br>$\pm$ 2      | 3.1<br>$\pm$ 1.3         | 4.3<br>$\pm$ 2.1             | 1.6<br>$\pm$ 0.8  | 2.2<br>$\pm$ 1                    | 2.7<br>$\pm$ 1.2                      | 79.8<br>$\pm$ 6.6 | 76.8<br>$\pm$ 5.3                | 76.2<br>$\pm$ 5.1                    | 16.8<br>$\pm$ 5.6 | 24.5<br>$\pm$ 4.8                         | 30.6<br>$\pm$ 5                               |
| <b>IL-13<sup>+</sup></b>                                         | 0.4<br>$\pm$ 0.2    | 0.2<br>$\pm$ 0.1         | 0.2<br>$\pm$ 0.1             | 9.7<br>$\pm$ 2.9  | 4.6<br>$\pm$ 1.1                  | 3.8<br>$\pm$ 0.9                      | 0.2<br>$\pm$ 0.3  | 0.1<br>$\pm$ 0.2                 | 0.1<br>$\pm$ 0.1                     | 23.8<br>$\pm$ 9.3 | 11.3<br>$\pm$ 4.8                         | 8.3<br>$\pm$ 3.7                              |
| <b>IFN-<math>\gamma</math><sup>+</sup><br/>IL-13<sup>+</sup></b> | 0.1<br>$\pm$ 0.1    | 0<br>$\pm$ 0.1           | 0<br>$\pm$ 0.1               | 0.2<br>$\pm$ 0.2  | 0.2<br>$\pm$ 0.1                  | 0.2<br>$\pm$ 0.2                      | 0.7<br>$\pm$ 0.7  | 0.4<br>$\pm$ 0.5                 | 0.4<br>$\pm$ 0.3                     | 5.8<br>$\pm$ 1.9  | 4<br>$\pm$ 1.3                            | 3.5<br>$\pm$ 1.2                              |
| <b>IFN-<math>\gamma</math><sup>-</sup><br/>IL-13<sup>-</sup></b> | 96.2<br>$\pm$ 2     | 96.8<br>$\pm$ 1.3        | 95.8<br>$\pm$ 2.1            | 88.4<br>$\pm$ 3.2 | 92.7<br>$\pm$ 1.3                 | 92.9<br>$\pm$ 1.3                     | 20.1 $\pm$<br>5.8 | 22.6<br>$\pm$ 4.3                | 23.7<br>$\pm$ 4.5                    | 48.9<br>$\pm$ 6.9 | 55.1<br>$\pm$ 8.9                         | 53.9<br>$\pm$ 6.5                             |

**Supplementary Table 2: Description of *CYP11A1* polymorphisms and their respective rs numbers, position within the gene, allele frequencies, linkage disequilibrium and genotyped tagging SNPs.**

| rs number         | Position in the gene structure | Minor allele frequency (MAF) <sup>1</sup> | LD <sup>2</sup> (r <sup>2</sup> ) with tagging SNP | Tagging SNP | Tagging block |
|-------------------|--------------------------------|-------------------------------------------|----------------------------------------------------|-------------|---------------|
| rs12917557        | promoter                       | 0.45                                      | 0.90                                               | rs11632698  | 4             |
| rs7163158         | promoter                       | 0.11                                      | 1.0                                                | rs4432229   | 1             |
| rs3825944         | promoter                       | 0.17                                      | 1.0                                                | rs2073475   | 2             |
| rs3803463         | promoter                       | 0.07                                      | 1.0                                                | rs1484215   | 3             |
| <b>rs4432229</b>  | promoter                       | <b>0.11</b>                               |                                                    |             | <b>1</b>      |
| rs4077581         | promoter                       | 0.28                                      | 0.92                                               | rs2279357   | 5             |
| rs4278698         | promoter                       | 0.11                                      | 1.0                                                | rs4432229   | 1             |
| rs8039957         | promoter                       | 0.11                                      | 1.0                                                | rs4432229   | 1             |
| rs4886595         | promoter                       | 0.14                                      |                                                    |             |               |
| rs9806234         | promoter                       | 0.27                                      |                                                    |             |               |
| rs16968478        | promoter                       | 0.21                                      |                                                    |             |               |
| rs16968477        | promoter                       | 0.16                                      | 0.89                                               | rs2073475   | 2             |
| <b>rs2073475</b>  | promoter                       | <b>0.18</b>                               |                                                    |             | <b>2</b>      |
| rs1130841         | exon 1                         | 0.005                                     |                                                    |             |               |
| rs7174179         | intron 1                       | 0.27                                      | 1.0                                                | rs2279357   | 5             |
| rs1843090         | intron 1                       | 0.27                                      | 1.0                                                | rs2279357   | 5             |
| <b>rs1484215</b>  | intron 2                       | <b>0.08</b>                               |                                                    |             | <b>3</b>      |
| rs12916123        | intron 2                       | 0.27                                      | 1.0                                                | rs2279357   | 5             |
| <b>rs11632698</b> | <b>intron 2</b>                | <b>0.37</b>                               |                                                    |             | <b>4</b>      |
| rs6161            | exon 5                         | 0.005                                     |                                                    |             |               |
| <b>rs2279357</b>  | <b>intron 8</b>                | <b>0.27</b>                               |                                                    |             | <b>5</b>      |
| rs900798          | downstream                     | 0.30                                      | 0.80                                               | rs2279357   | 5             |
| rs2959002         | downstream                     | 0.27                                      | 0.97                                               | rs2279357   | 5             |
| rs2959003         | downstream                     | 0.30                                      | 0.80                                               | rs2279357   | 5             |
| rs900802          | downstream                     | 0.29                                      | 0.87                                               | rs2279357   | 5             |
| rs11635047        | downstream                     | 0.37                                      | 0.95                                               | rs11632698  | 4             |
| rs2279356         | downstream                     | 0.27                                      | 0.89                                               | rs2279357   | 5             |

<sup>1</sup> Minor allele frequency (MAF) = based on the HapMap CEU population

<sup>2</sup> LD = linkage disequilibrium

**Supplementary Table 3: *In silico* analyses for putative regulatory functions for asthma-associated *CYP11A1* SNPs.**

| Tagging bin | SNP               | Location   | Major allele <sup>1</sup>                       | Minor allele <sup>1</sup>                | Major allele <sup>2</sup> | Minor allele <sup>2</sup> | RegulomeDM Score <sup>3</sup> | Histone modifications <sup>3</sup> | beta-score (p-value) <sup>4</sup> |
|-------------|-------------------|------------|-------------------------------------------------|------------------------------------------|---------------------------|---------------------------|-------------------------------|------------------------------------|-----------------------------------|
| 1           | rs8039957         | promoter   | SP1                                             | SP1                                      | 3                         | 8                         | 6                             | weak Repressed PolyComb            | -0.04 (0.0780)                    |
|             | rs4278698         | promoter   | SP1, Tra-1                                      | REV-Erb A                                | 5                         | 4                         | no data                       | no data                            | -0.04 (0.1380)                    |
|             | <b>rs4432229</b>  | promoter   | CEBP $\alpha$                                   | HNF1C                                    | 4                         | 6                         | 4                             | active TSS                         | -0.04 (0.0780)                    |
|             | rs7163158         | promoter   | REV-Erb A, COUP                                 | REV-Erb A, COUP, ARP1, SP1               | 16                        | 18                        | 6                             | weak transcription                 | -0.06 (0.0223)                    |
|             | <b>rs4886595</b>  | promoter   | CEBP $\alpha$ , - $\beta$ , Oct-1, NF-EM5, MyoD | CEBP $\alpha$ , - $\beta$ , Oct-1        | 10                        | 13                        | 3a                            | quiescent/low                      | -0.06 (0.0028)                    |
| 2           | rs12917557        | promoter   | NF- $\kappa$ B, PTF1 $\beta$ , SP1              | NF- $\kappa$ B, PTF1 $\beta$ , GCN4, SP1 | 6                         | 7                         | 5                             | quiescent/low                      | -0.01 (0.6262)                    |
|             | <b>rs11632698</b> | intron 2   | GR, CEBP $\alpha$                               | CEBP $\alpha$                            | 13                        | 17                        | 2a                            | quiescent/low                      | -0.04 (0.1380)                    |
|             | rs11635047        | downstream |                                                 |                                          |                           |                           | 5                             | quiescent/low                      | 0.01 (0.7371)                     |

SNPs in bold letters indicate tagging SNPs

<sup>1</sup>Different predicted transcription factor (TF) binding sites depending on the genotype using MatInspector ([www.genomatix.de](http://www.genomatix.de)).

<sup>2</sup>Different predicted TF binding sites depending on the genotype using Alibaba ([www.gene-regulation.com](http://www.gene-regulation.com)).

<sup>3</sup>Putative regulatory function based on regulomeDB, predicted histone modifications are based on data available from naive primary CD8<sup>+</sup> cells from peripheral blood.

2a: TF binding + matched TF motif + matched DNase footprint + DNase peak

3a: TF binding + any motif + DNase peak

4: TF binding + DNase peak

5: TF binding + DNase peak

6: Other

<sup>4</sup>Allele-specific gene expression analyses in EBV-transformed lymphoblastoid cell lines of unrelated samples of the HapMap population (<http://app3.titan.uio.no/biotools>).



**Supplementary Table 4: qPCR primers used for gene expression experiments.**

| Primer name                                        | Sequence (5'3')         |
|----------------------------------------------------|-------------------------|
| <i>Gata3</i> forward                               | GACTCTTCCCACCCAGCAGC    |
| <i>Gata3</i> reverse                               | CCATCTCGCCGCCACAG       |
| <i>Gata3</i> probe                                 | CAAGGCACGATCCAGCACAG    |
| <i>Tbx21</i> (LifeTechnologies pre-designed assay) | Mm00450960_m1           |
| <i>Cyp11a1</i> forward                             | TGATGACCTATTCCGCTTTTCC  |
| <i>Cyp11a1</i> reverse                             | GGTTGAGCATGGGGACACTG    |
| <i>Cyp11a1</i> probe                               | ATGCTGGAGGAGATCGTGGA    |
| <i>Vdr</i> forward                                 | AGAAGGCTCCGATGACCCC     |
| <i>Vdr</i> reverse                                 | AAGGTAAAAGACTGGTTGGAGCG |
| <i>Vdr</i> probe                                   | CCGCTCTCCATGCTGCCCCACC  |
| <i>18SrRNA</i> forward                             | AGTCCCTGCCCTTTGTACACA   |
| <i>18SrRNA</i> reverse                             | GATCCGAGGGCCTCACTAAAC   |
| <i>18SrRNA</i> probe                               | CGCCCGTCGCTACTACCGATTGG |

**Supplementary Table 5: *Cyp11a1* promoter-specific primers used for VDR ChIP experiments.**

| Primer name | Primer sequence (5'3')    |
|-------------|---------------------------|
| VDR_1fwd    | CTGGGGCTACACCGTGATTC      |
| VDR_1rev    | CTTTTAAGATCCCCCTGCCTC     |
| VDR_2fwd    | CTTGCTAGAACCCAGTGTAATGAAC |
| VDR_2rev    | AAGTTCACAGCGGTCCTCG       |
| VDR_3fwd    | GCATTGATCCCAGAGAGGTTAAG   |
| VDR_3rev    | CTGGTCCCATTGGCTTCTG       |
| VDR_4+5fwd  | GCTTCCTGAGTTGAGTTTTGTTATG |
| VDR_4+5rev  | CCATCCCTCCCTCCAAGC        |
| VDR_6+7fwd  | TCGCCTGTCTCTGCCTCC        |
| VDR_6+7rev  | TGAGTTCTAGTCCCCAGCAGC     |
